# Supplementary material for: PPFIA1 drives active α5β1 integrin recycling and controls fibronectin fibrillogenesis and vascular morphogenesis
Source: Nat Commun. 2016 Nov 23;7:13546. doi: 10.1038/ncomms13546 (PMC5122980; doi:10.1038/ncomms13546)
Supplement: Supplementary Information — Supplementary Figures 1 - 14 and Supplementary Tables 1 - 3 [file ncomms13546-s1.pdf]

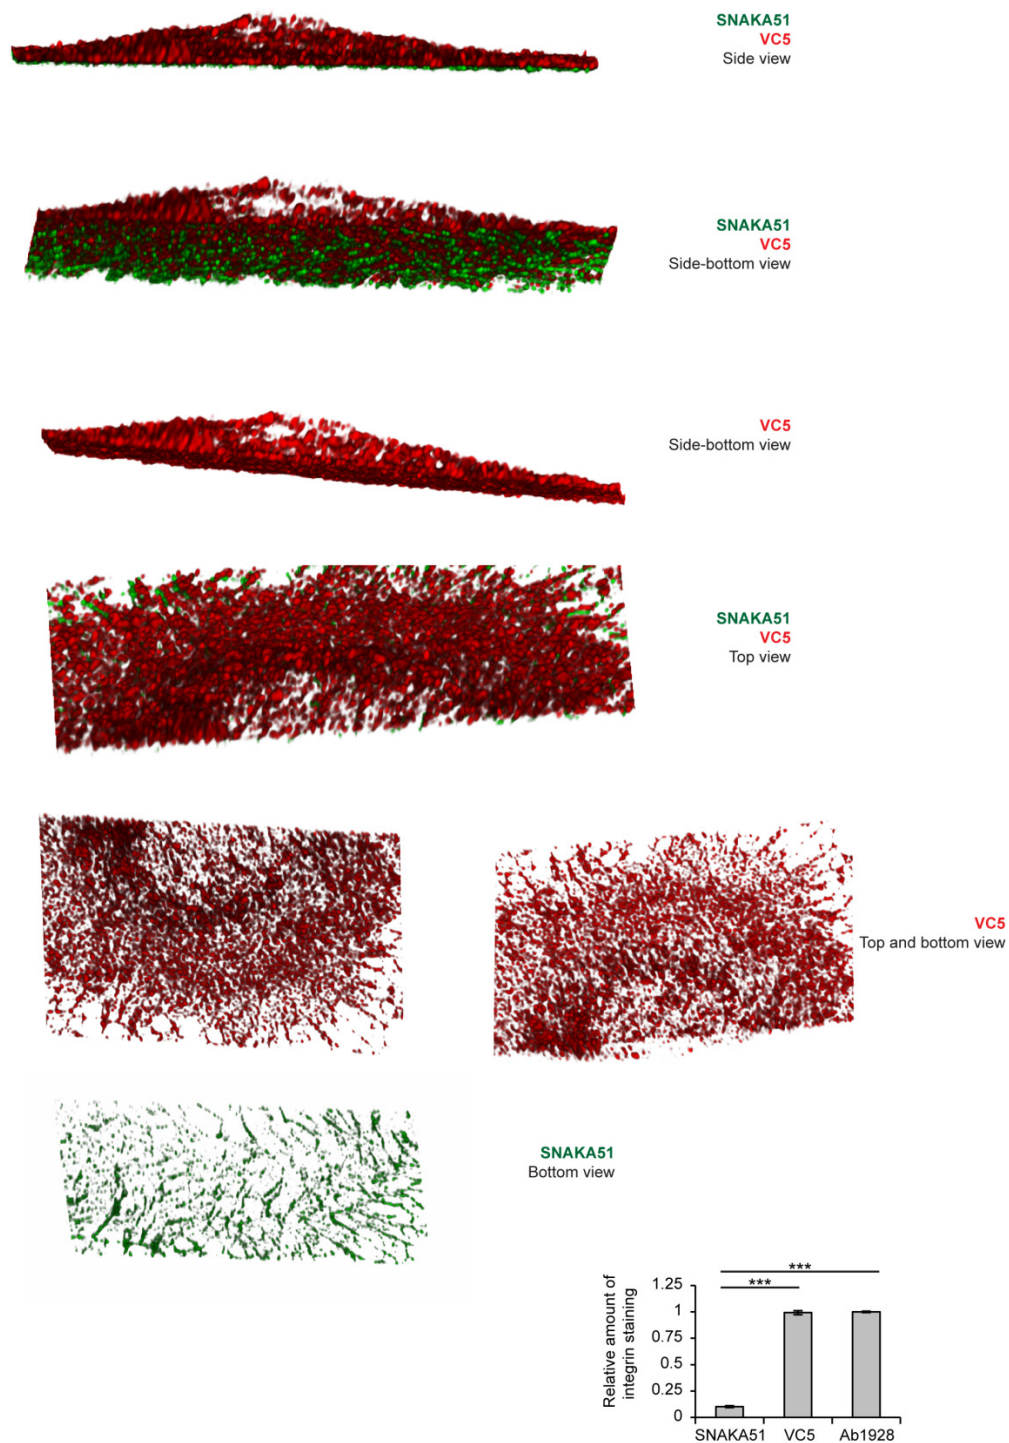

**Supplementary Figure 1. 3D reconstruction, distribution, and amount quantification of active and total  $\alpha 5$  integrin in ECs.** Confocal xy sectioning microscopy analysis and 3D reconstruction of anti-active  $\alpha 5$  integrin cell surface localization following 20 minutes of incubation with SNAKA51 mAb (green) and VC5 mAb (red) on living ECs. Side, top, and bottom views as well as quantitative analysis of apico-basal mean fluorescence intensity ratio revealed that while SNAKA51<sup>+</sup> active  $\alpha 5$  integrin localizes on the basolateral surface of ECs, VC5<sup>+</sup> total  $\alpha 5$  integrin is randomly distributed all around the cell surface. Quantitative analysis of apico-basal mean fluorescence intensity ratio of total  $\alpha 5\beta 1$  integrin, as recognized by rabbit polyclonal Ab1928 antibody, was performed as further control of VC5 staining. \*\*\*P < 0.001, Student's t-test.

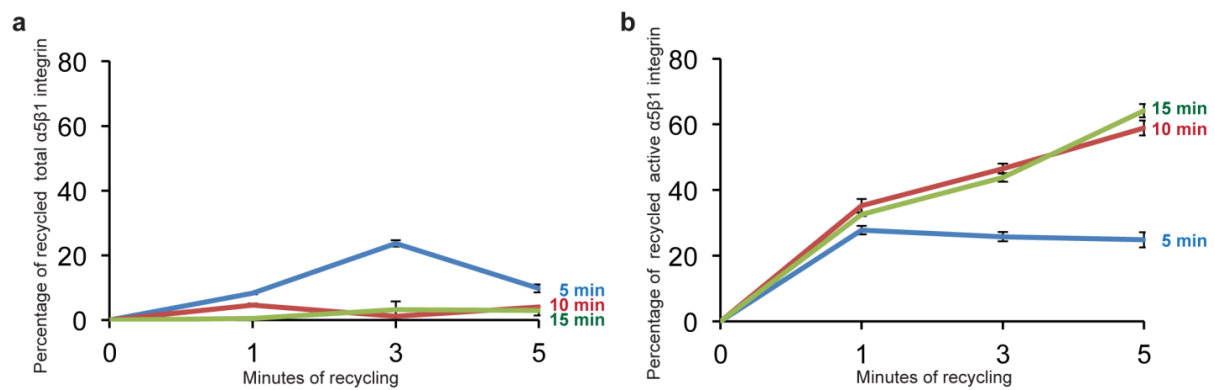

**Supplementary Figure 2. In ECs total/inactive, but not active  $\alpha 5 \beta 1$  integrin recycles mainly from early endosomal compartments.** Time-course analysis of the relative amounts of total/inactive (**a**) or active (**b**)  $\alpha 5 \beta 1$  integrins, as respectively recognized by VC5 and SNAKA51 mAbs, which recycle after being left to be endocytosed for different time points. Total/inactive (**a**), but not active (**b**)  $\alpha 5 \beta 1$  integrins are only and rapidly recycled to the EC surface within 5 minutes after endocytosis. On the contrary, active (**b**)  $\alpha 5 \beta 1$  integrins are recycled to the cell surface also at later time points (10 and 15 min). Values are mean  $\pm$  s.e.m.,  $n = 3$  technical replicates. One out of three independent experiments is shown.

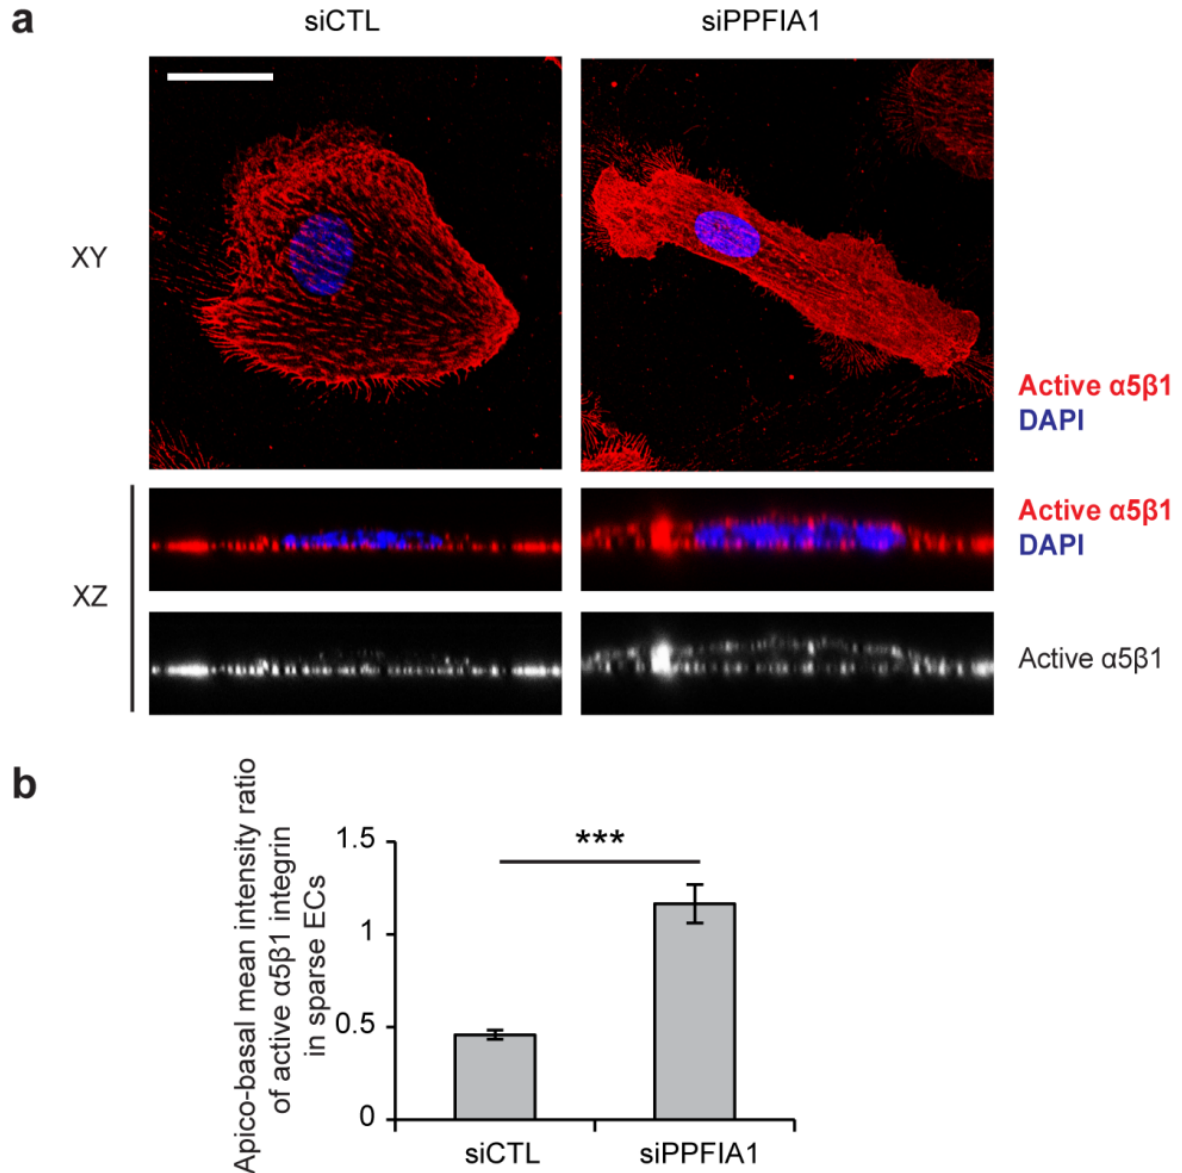

**Supplementary Figure 3. PPFIA1 drives basolateral localization of active  $\alpha 5\beta 1$  integrin in sparse cells.** (a) Confocal xy and xz sectioning microscopy analysis of anti-active  $\alpha 5\beta 1$  integrin cell surface localization (red) following 20 minutes of incubation with SNAKA51 mAb on living sparse ECs. (b) Quantitative analysis of apico-basal mean intensity ratio of SNAKA51<sup>+</sup> active  $\alpha 5\beta 1$  integrin. SNAKA51<sup>+</sup> active  $\alpha 5\beta 1$  integrin localizes on the basolateral surface of sparse siCTL, but not siPPFIA1 ECs, in which it randomly redistributes all around the cell surface. Data are mean  $\pm$  s.e.m., n = 20 cells per condition pooled from 2 independent experiments. Scale bar, 20  $\mu$ m (a) \*\*\*P < 0.001, Student's t-test.

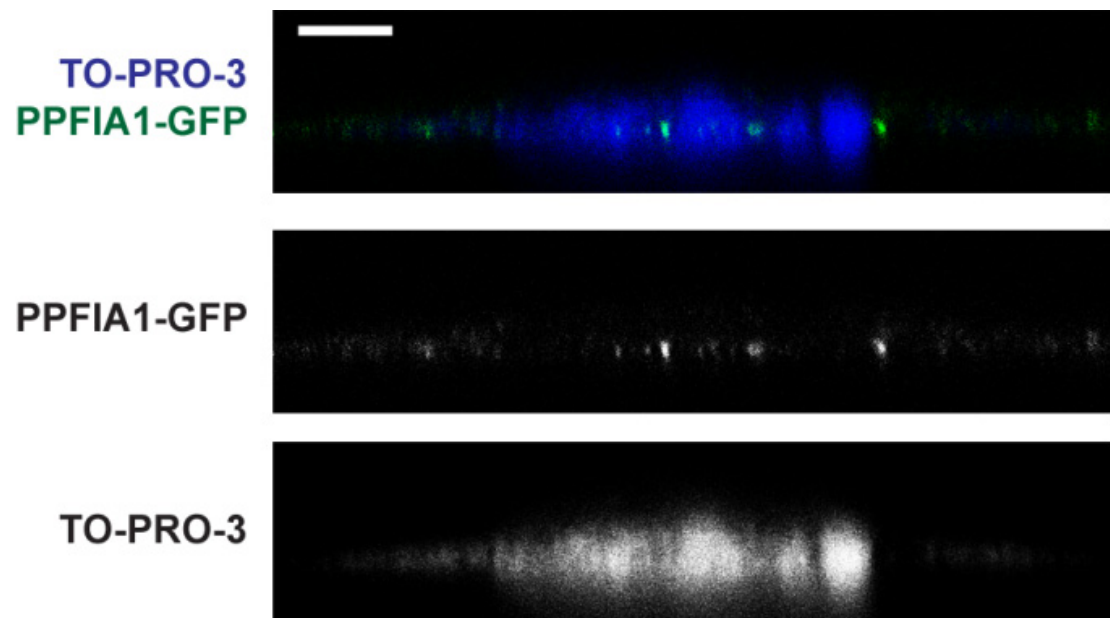

**Supplementary Figure 4. PPFIA1 localizes on the basolateral surface of ECs.** Confocal xz sectioning microscopy analysis of PPFIA1-GFP localization (green) in confluent ECs that were co-stained with the nuclear marker TO-PRO-3. Scale bar, 5 $\mu$ m

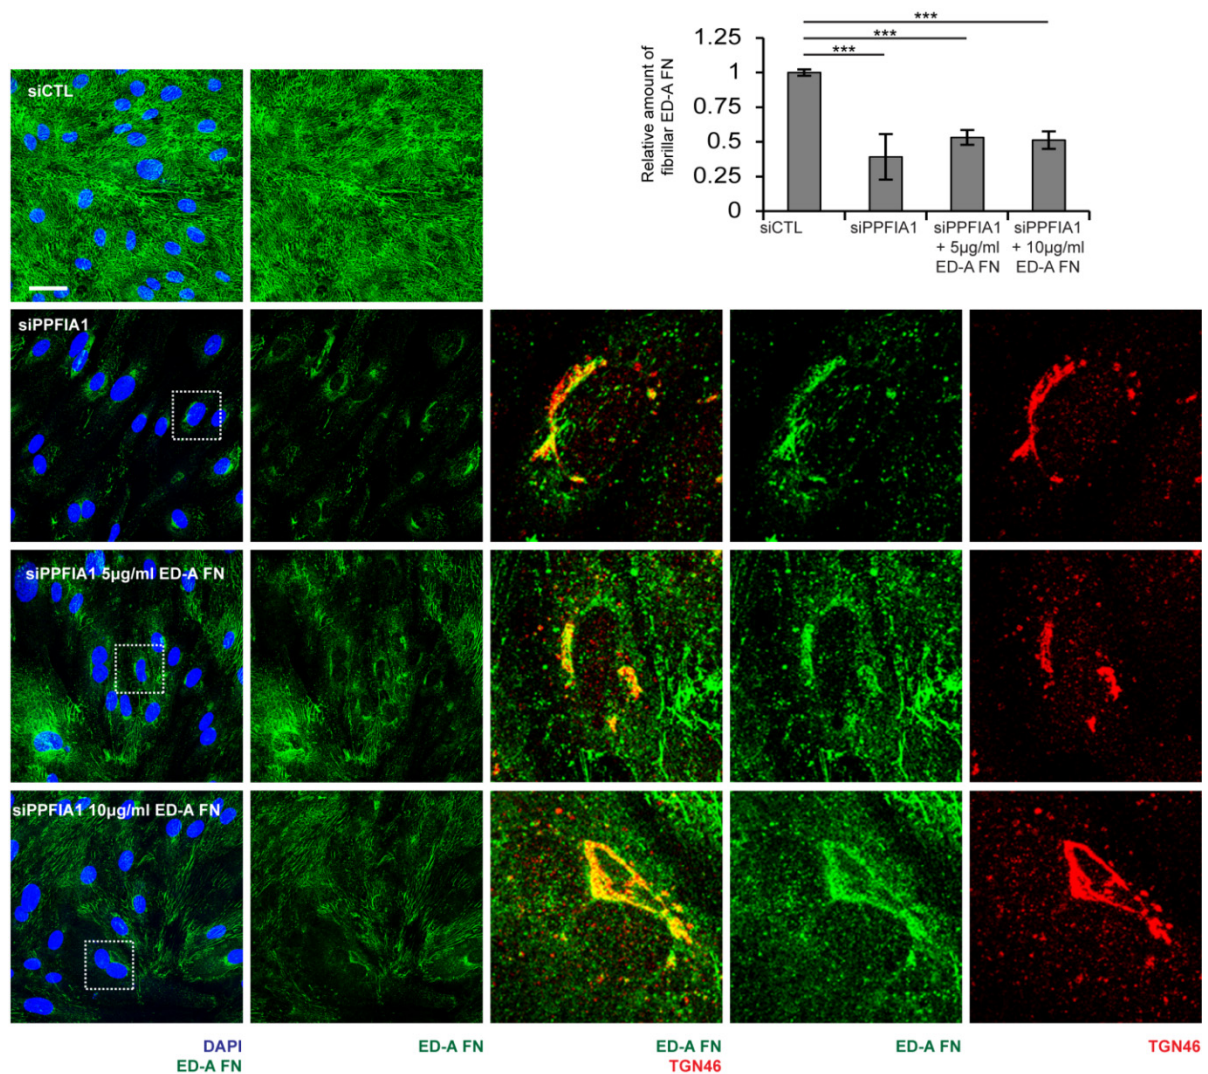

**Supplementary Figure 5. Exogenous ED-A FN doesn't rescue basolateral fibrillar FN network in siPPFIA1 ECs.** Confocal microscopy analysis of IST-9 mAb-labeled ED-A FN (green) in confluent ECs. ED-A FN polymerizes into a fibrillar network in siCTL, but not in siPPFIA1 ECs in which it accumulates in the TGN46+ (red) TGN cisternae. Exogenously added ED-A FN (5 µg/ml or 10 µg/ml) does not restore basolateral ED-A FN polymerization in siPPFIA1 ECs. The relative amount of fibrillar ED-A FN area was calculated in siCTL, siPPFIA1 and siPPFIA1 + 5 or 10 µg/ml exogenous ED-A FN ECs. Data are mean ± s.e.m., n = 20 cells per condition pooled from 2 independent experiments. Scale bar, 50 µm. \*\*\*P < 0.001, Student's t-test.

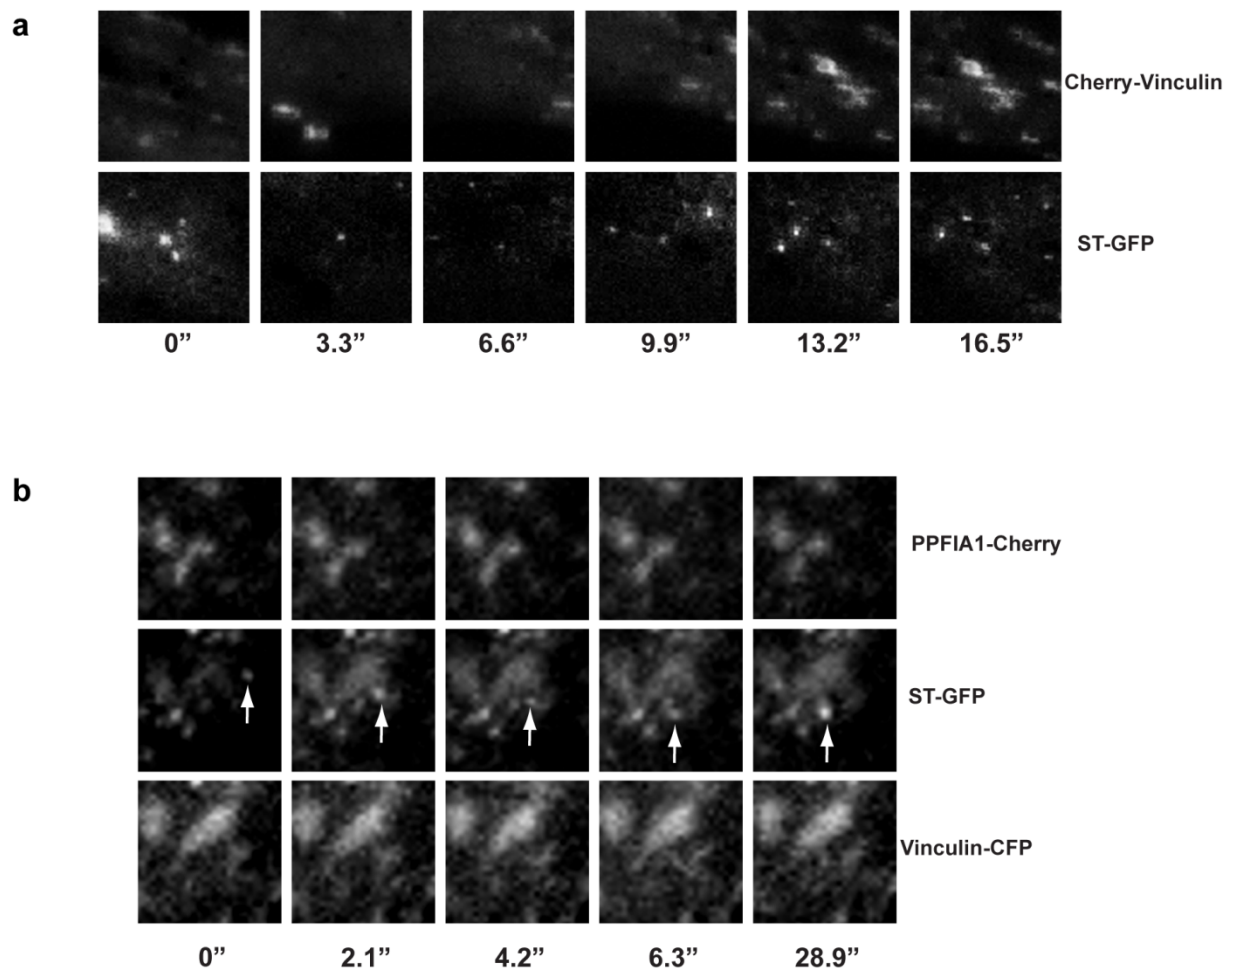

**Supplementary Figure 6. Post-Golgi carrier vesicles target endothelial ECM adhesions.**

(a, b) Single channel photographs of the magnifications of the snapshots from live time-lapse total internal reflection fluorescence (TIRF) microscopy shown in Figure 5.

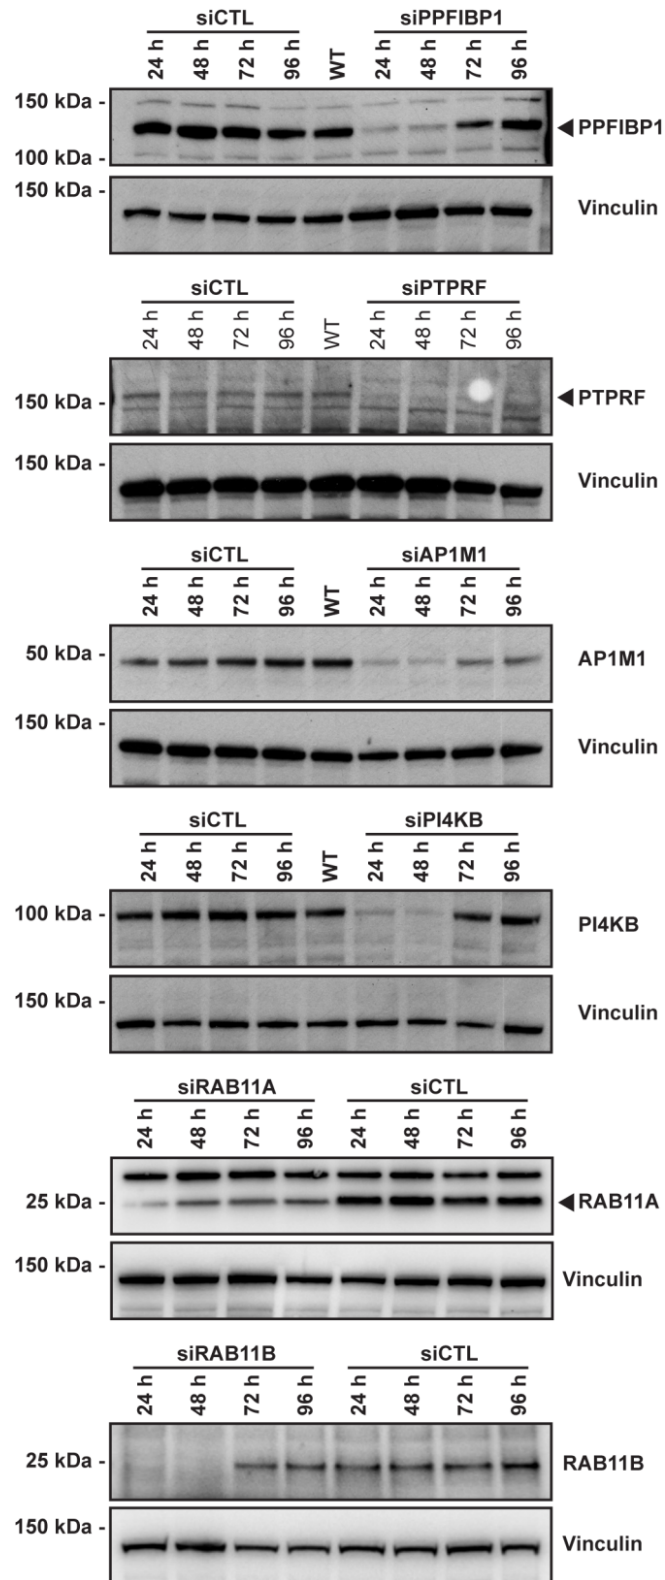

**Supplementary Figure 7. Effective siRNA-mediated gene silencing of PPFIBP1, PTPRF, AP1M, PI4KB, RAB11A, and RAB11B proteins in ECs.** Western blot analysis of lysates of ECs, control (siCTL), or PPFIBP1 (siPPFIBP1), or PTPRF (siPTPRF), or AP1M1 (siAP1M1), or PI4KB (siPI4KB), or RAB11A (siRAB11A), or RAB11B (siRAB11B) silenced. ECs were lysed 24, 48, 72 and 96 hours after the second siRNA oligofection and proteins were separated by SDS-PAGE and probed for the corresponding Abs. Where more bands are present in Western Blots the arrowhead indicates the one corresponding to the specific protein.

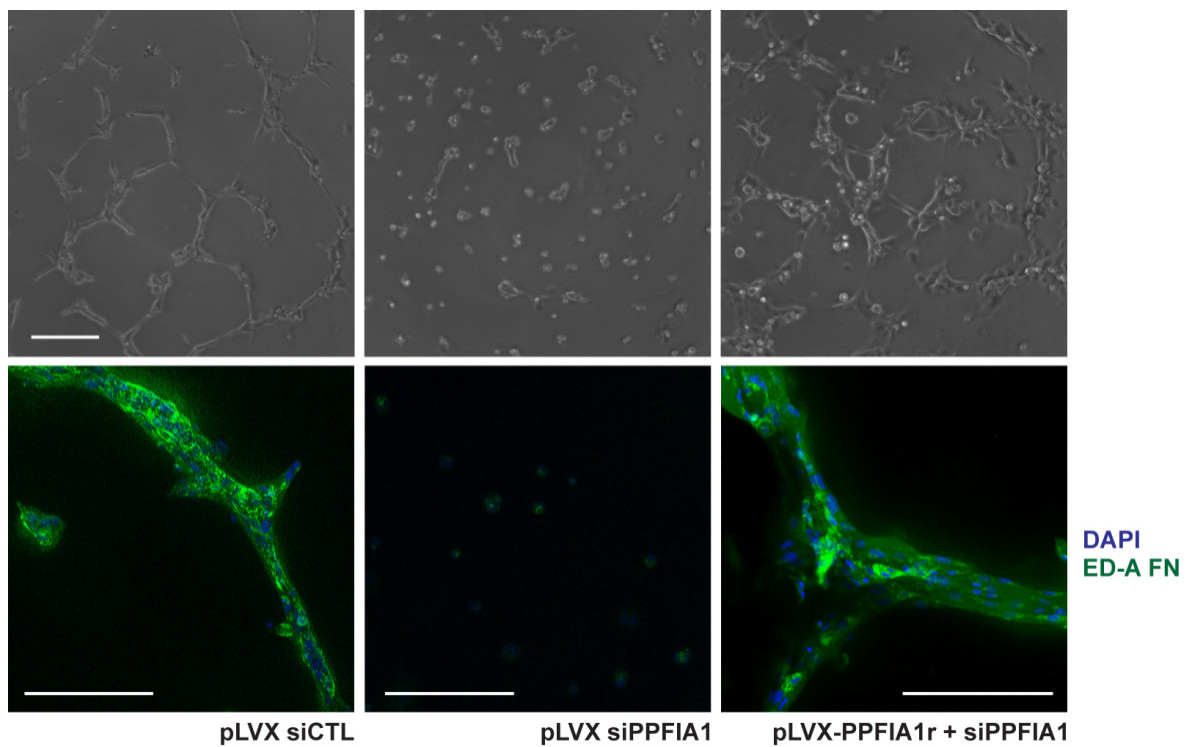

**Supplementary Figure 8. PPFIA1 silencing affects vascular morphogenesis in cultured ECs.** Representative pictures of vascular networks formed by pLVX siCTL, pLVX siPPFIA1, and pLVX- PPFIA1r + siPPFIA1 ECs plated on growth factor-reduced Matrigel matrix. PLVX siCTL but not pLVX siPPFIA1 ECs form capillary networks that are covered by a dense meshwork of polymerized cellular ED-A fibronectin. PLVX-mediated PPFIA1r overexpression restores capillary network formation and ED-A FN polymerization by siPPFIA1 ECs. Scale bar, 100  $\mu$ m.

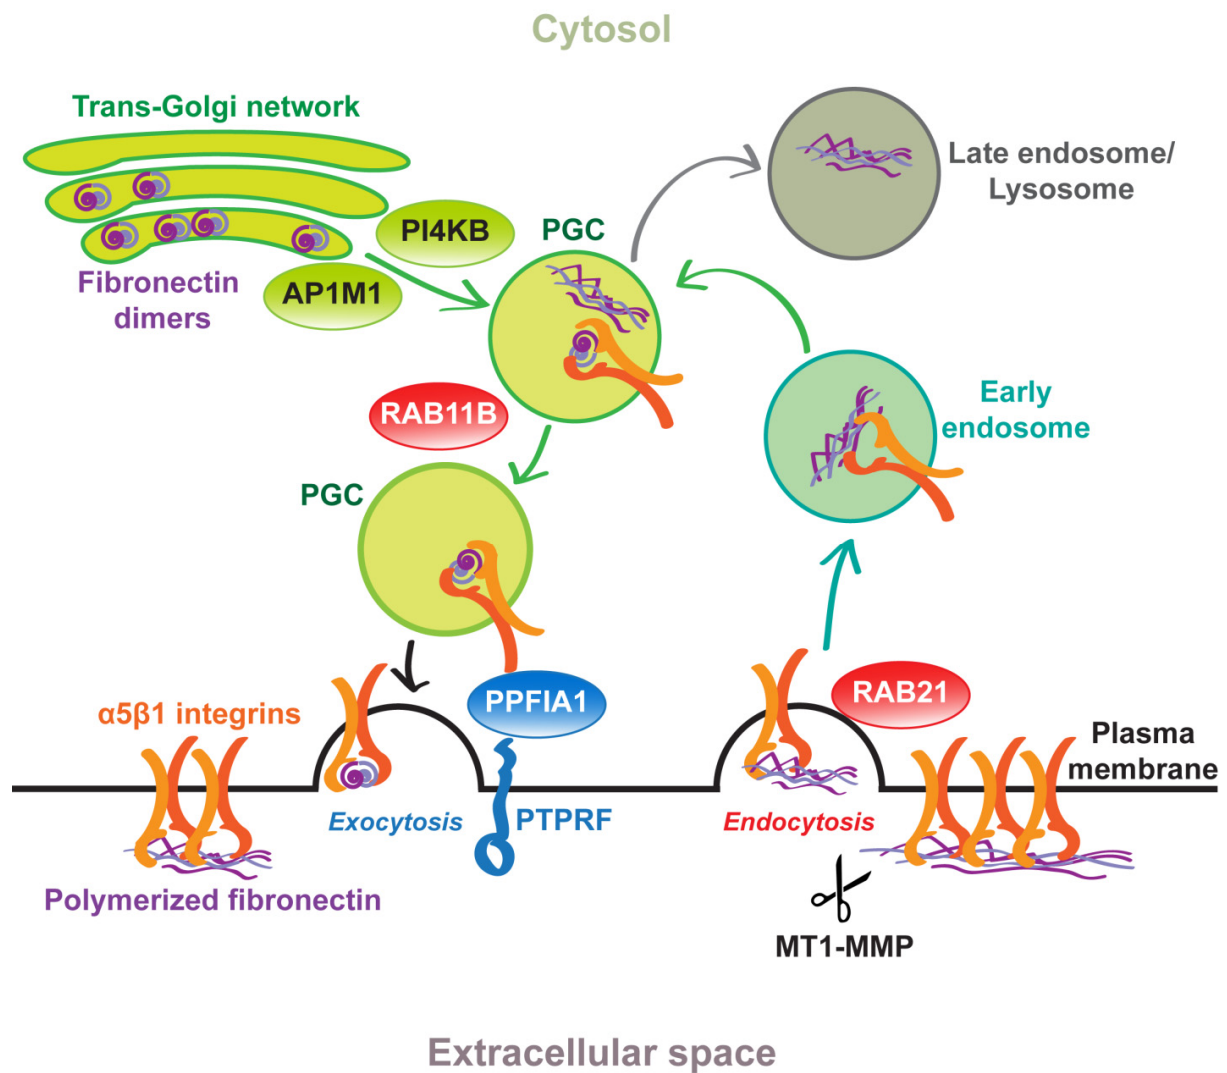

**Supplementary Figure 9. A TGN-hinged signaling pathway couples active  $\alpha 5 \beta 1$  integrin traffic and fibronectin fibril turnover.** In ECs, upon MT1-MMP-dependent cleavage of FN fibrils, FN fragment-bound active  $\alpha 5 \beta 1$  integrins undergo Rab21 GTPase-driven internalization within early endosomes. From this subcellular location, FN fragment-bound active  $\alpha 5 \beta 1$  integrins traffic to post-Golgi vesicles (PGCs) that bud, in a PI4KB and AP-1A-dependent manner, from the Trans-Golgi network (TGN) cisternae and contain freshly synthesized FN. Within PGCs, active  $\alpha 5 \beta 1$  integrins may swap old FN fragments for new FN dimers and the former are likely directed towards the late endosomal/lysosomal compartments for degradation. PGCs containing fresh FN-bound active  $\alpha 5 \beta 1$  integrins are then directed, on a RAB11B-dependent pathway, towards the basolateral side of ECs. Here, the PTPRF/PPFIA1 complex localizes in close proximity of fibrillar adhesions. Similarly to the function that it plays in neuron presynaptic sites and thanks to its ability to bind the  $\beta 1$  cytotail of active  $\alpha 5 \beta 1$  integrin, PPFIA1 may favor the docking of PGCs containing fresh FN-bound active  $\alpha 5 \beta 1$  integrins. The ensuing fusion of PGCs with the plasma membrane may favor the targeted local appearance of fresh FN-bound active  $\alpha 5 \beta 1$  integrins, thus allowing the replacement of old for new FN within fibrils. Finally, a corollary hypothesis may be that, upon endocytosis, active  $\alpha 5 \beta 1$  integrin-bound non-polymerized FN dimers recycle back to the basolateral EC surface and that this endo-exocytic cycle continues until FN dimers incorporate into fibrils due to polymerization (not depicted).

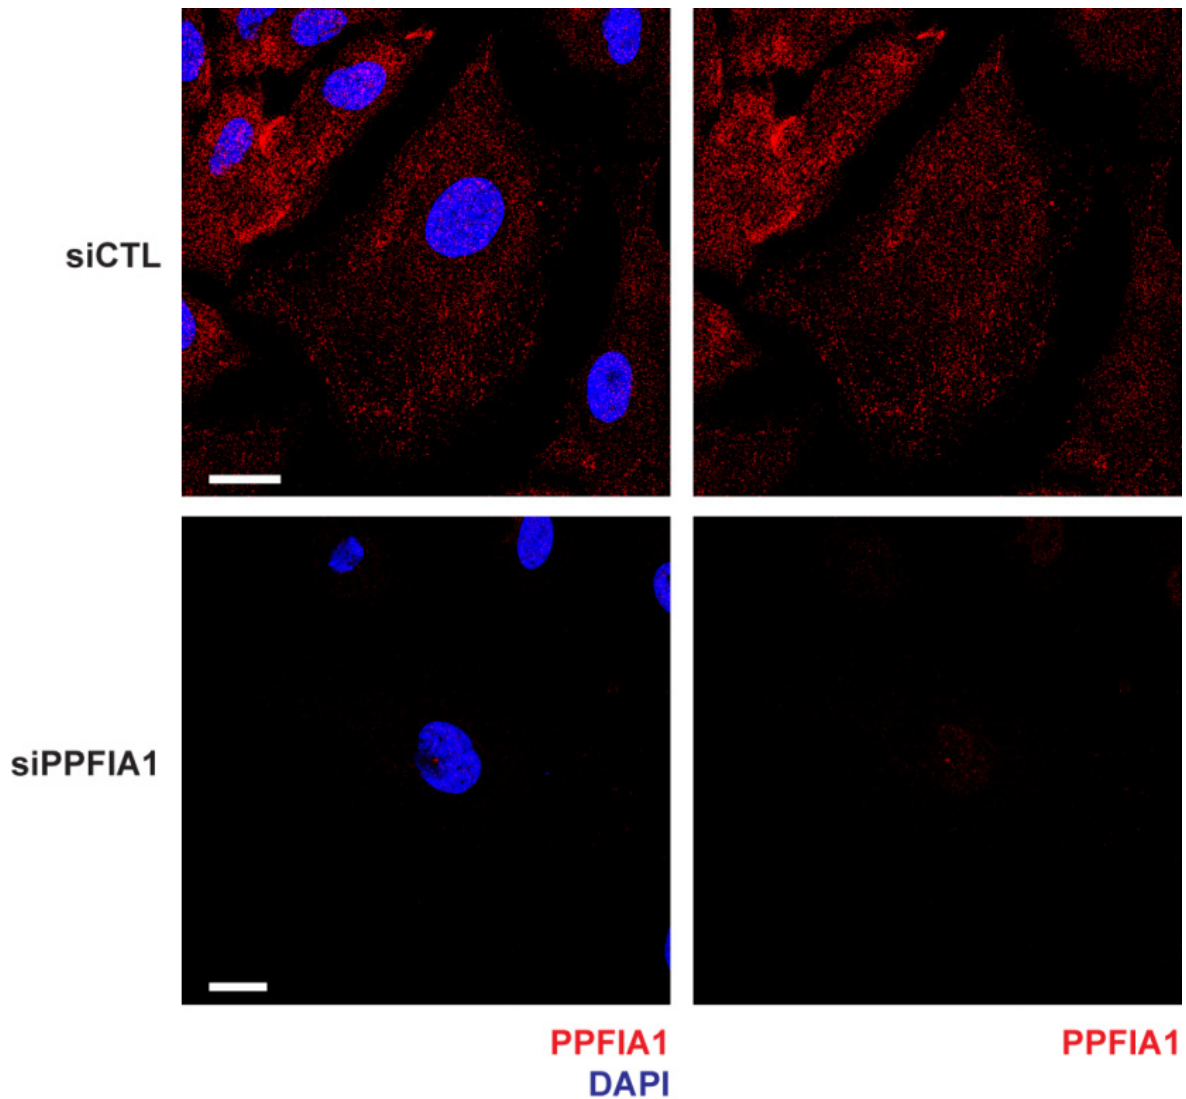

**Supplementary Figure 10. Characterization of rabbit polyclonal anti-PPFIA1 antibody.** siCTL or siPPFIA1 ECs were fixed and stained with rabbit polyclonal antibody anti-PPFIA1 and DAPI. Confocal fluorescence microscopy analysis demonstrate that specific PPFIA1 staining present in siCTL ECs is totally absent in siPPFIA1 ECs. Scale bar, 20 $\mu$ m.

Figure 1, panel d

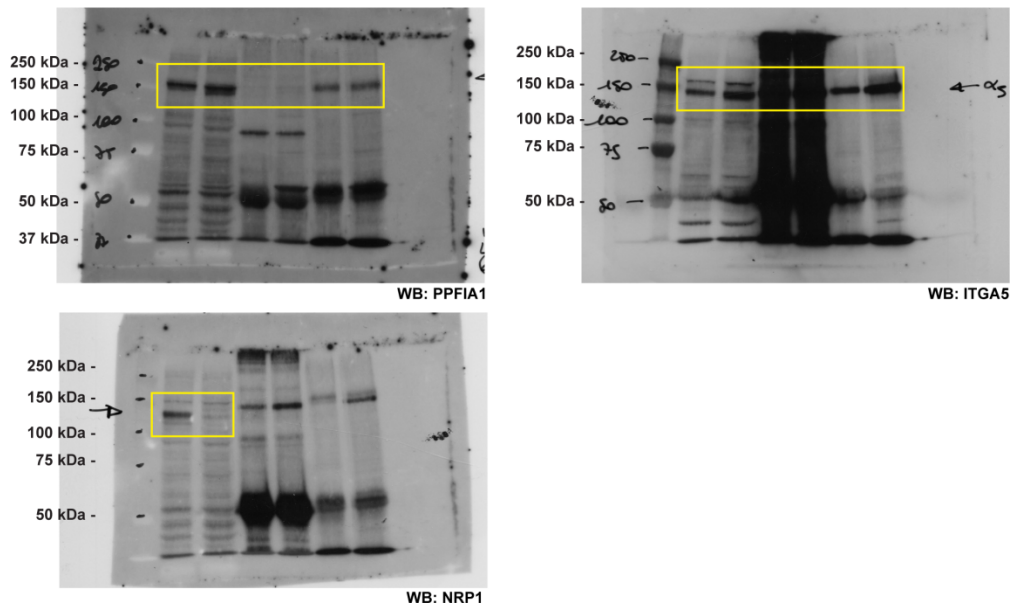

Figure 1, panel e

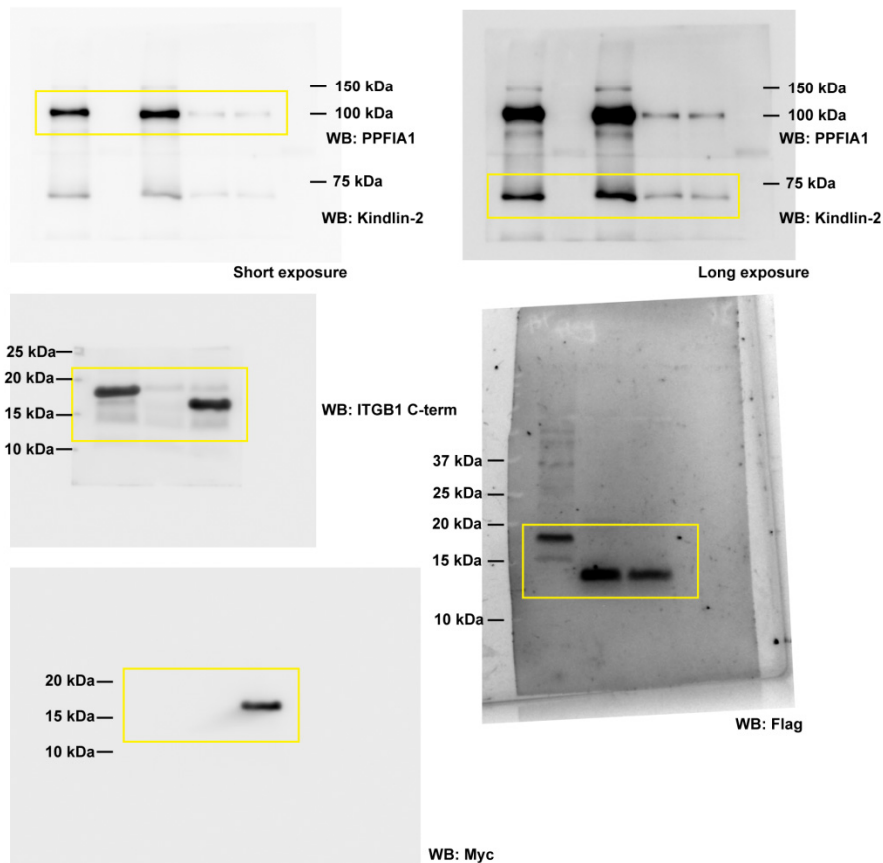

**Supplementary Figure 11. Full images of blots that were cropped in main Figure 1. Yellow squares indicate the cropped images.**

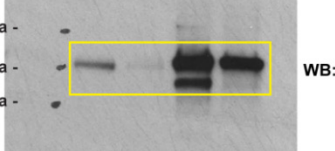

Western blot analysis of PPF1A1 and  $\alpha$ -tubulin expression in H1299 cells. The top panel shows PPF1A1 protein levels, with a yellow box highlighting the bands at approximately 150 kDa. The bottom panel shows  $\alpha$ -tubulin protein levels, with a yellow box highlighting the bands at approximately 50 kDa. The lanes are labeled as follows: Control, PPF1A1, PPF1A1 + 100 ng/ml, PPF1A1 + 100 ng/ml + 100 ng/ml, and PPF1A1 + 100 ng/ml + 100 ng/ml + 100 ng/ml.

Western blot analysis showing the detection of ED-A Fibrinogen (top panel) and IgG heavy chain (bottom panel) in the conditioned media of the cells. The top panel shows bands for ED-A Fibrinogen at approximately 150 kDa, and the bottom panel shows bands for IgG heavy chain at approximately 50 kDa. The lanes are labeled 1 through 6, corresponding to the different experimental conditions described in the text.

Western blot analysis of H1299 cells treated with 100 nM of the indicated compounds for 24 h. The blots show protein levels for PPF1A1, RAB21, and Actin. Molecular weight markers are indicated on the left of each blot. The PPF1A1 blot shows a band at approximately 150 kDa. The RAB21 blot shows a band at approximately 25 kDa. The Actin blot shows a band at approximately 43 kDa. The blots are labeled on the right as WB: PPF1A1, WB: RAB21, and WB: Actin. A yellow box highlights the bands for PPF1A1, RAB21, and Actin in each blot.

Western blot analysis showing protein expression levels. The top blot is probed for ED-A Fibronectin, and the bottom blot is probed for Vimentin. Molecular weight markers are indicated on the left of each blot.

**ED-A Fibronectin Blot:**

- Markers: 250 kDa, 150 kDa, 100 kDa, 75 kDa, 50 kDa, 37 kDa.
- Lanes: Labeled 'Ct' (control), 'UP' (untreated), and 'UP' (untreated) with a handwritten '2x' above the second 'UP' lane.
- Results: A single band is visible in the 'Ct' lane, highlighted by a yellow box. Faint bands are visible in the 'UP' lanes.
- Label: 'WB: ED-A Fibronectin'.
- Handwritten note: 'FW' (flow cytometry) is present in the bottom right corner.

**Vimentin Blot:**

- Markers: 250 kDa, 150 kDa, 100 kDa, 75 kDa, 50 kDa, 37 kDa.
- Lanes: Multiple lanes showing various protein bands.
- Results: A band is visible in the first three lanes, highlighted by a yellow box.
- Label: 'WB: Vimentin'.

12

Figure 8, panel e

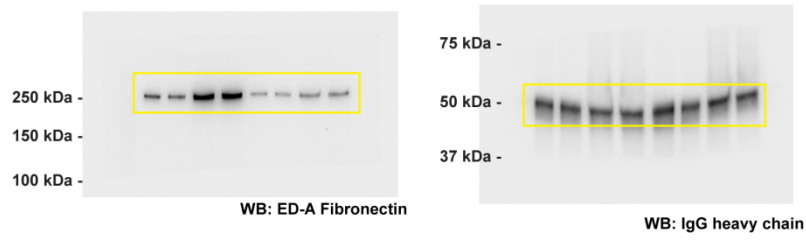

Figure 9, panel a

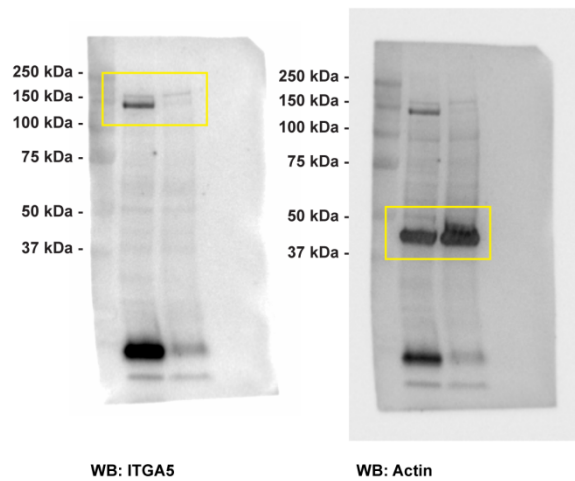

Figure 9, panel c

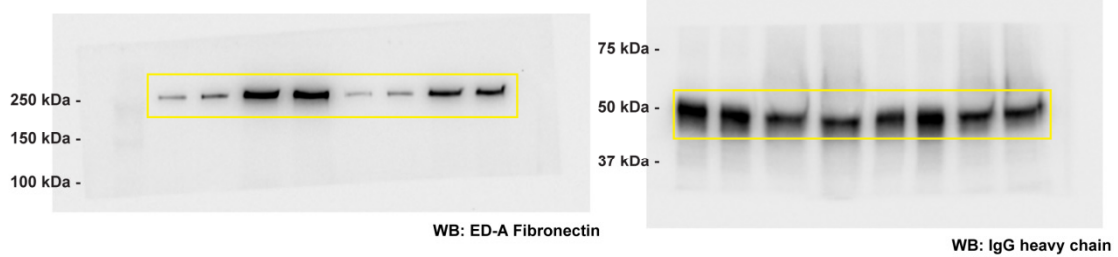

Figure 10, panel b

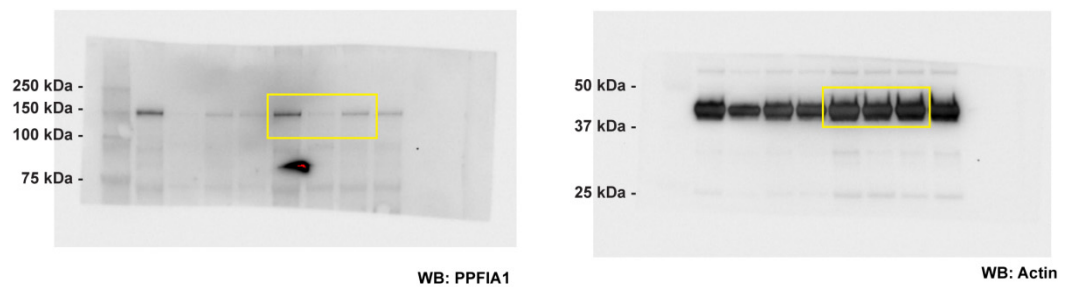

**Supplementary Figure 13. Full images of blots that were cropped in main Figures 8, 9, and 10. Yellow squares indicate the cropped images.**

Supplementary figure 7

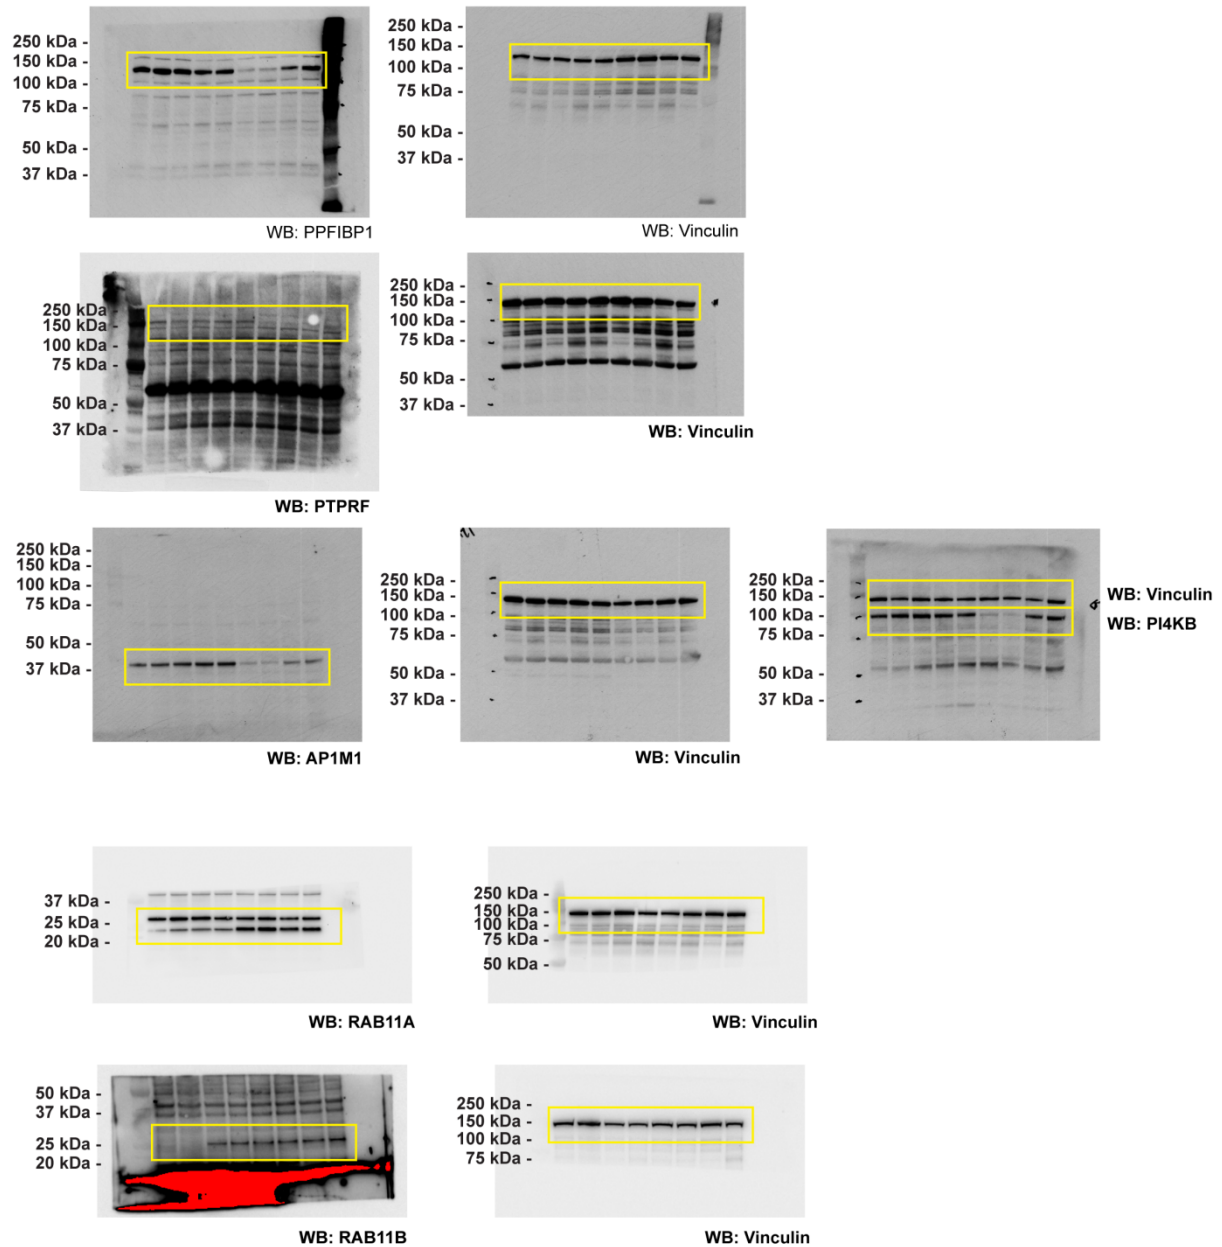

**Supplementary Figure 14.** Full images of blots that were cropped in Supplementary Figure 7. Yellow squares indicate the cropped images.

|                              | MO CTL | MO <i>ppfia1</i> | MO <i>ppfia1</i><br>+ mRNA <i>PPFIA1</i> |
|------------------------------|--------|------------------|------------------------------------------|
| Injected eggs                | 226    | 467              | 585                                      |
| Total embryos<br>after 72hpi | 154    | 252              | 307                                      |
| Normal embryos               | 148    | 166              | 261                                      |
| Altered embryos              | 6      | 84               | 47                                       |

**Supplementary Table 1. Absolute number of MO-CTL, MO-*ppfia1* and MO-*ppfia1*+*PPFIA1* embryos having normal or altered phenotype.**

|                 | MO CTL | MO <i>ppfia1</i> | MO <i>ppfia1</i><br>+ mRNA <i>PPFIA1</i> |
|-----------------|--------|------------------|------------------------------------------|
| Normal embryos  | 96     | 66               | 84                                       |
| Altered embryos | 3,8    | 33,6             | 15,3                                     |

**Supplementary Table 2. Relative Percentage of MO-CTL, MO-*ppfia1* and MO-*ppfia1*+*PPFIA1* embryos having normal or altered phenotype.**

| Antigen     | Antibody              | Provider                 | WB     | IF    | IP     |
|-------------|-----------------------|--------------------------|--------|-------|--------|
| Actin       | NB100-74340           | Novus Biologicals        | 1:5000 |       |        |
| AP1M1       | 12112-1-AP            | PTG                      | 1:1000 |       |        |
| EEA1        | sc-6415               | Santa Cruz               |        | 1:200 |        |
| Fibronectin | F3648                 | Sigma                    |        | 1:200 |        |
| Fibronectin | sc-59826 (clone IST9) | Santa Cruz               | 1:1000 | 1:100 |        |
| Flag        | A8592 (clone M2)      | Sigma                    | 1:1000 |       |        |
| ITGA5       | AB1949                | Millipore                | 1:1000 |       |        |
| ITGA5       | SNAKA51               | Martin J. Humphries' lab |        | 1:100 | 1µg/ml |
| ITGA5       | 555651 (clone VC5)    | BD Biosciences           |        |       | 1µg/ml |
| ITGB1       | AB1952                | Millipore                | 1:2000 |       |        |
| Kindlin-2   | Mab2617               | Millipore                | 1:1000 |       |        |
| LAMP1       | 555798                | BD Biosciences           |        | 1:50  |        |
| Myc         | 05-419 (clone 9E10)   | Millipore                | 1:1000 |       |        |
| NRP1        | sc-7239               | Santa Cruz               | 1:1000 |       |        |
| PI4KB       | NBP2-12814            | Novus Biologicals        | 1:1000 |       |        |
| PPFIA1      | 14175-1-AP            | PTG                      | 1:1000 | 1:50  |        |
| PPFIBP1     | 13961-1-AP            | PTG                      | 1:1000 |       |        |
| PTPRF       | sc-135969             | Santa Cruz               | 1:500  |       |        |
| Rab11A      | TA324158              | Origene                  | 1:500  |       |        |
| Rab11B      | TA346586              | Origene                  | 1:500  |       |        |
| Rab21       | Rabbit polyclonal     | Johanna Ivaska's lab     | 1:2000 |       |        |
| TGN46       | AHP1586               | ABD Serotec              |        | 1:100 |        |
| TGN46       | AHP500                | ABD Serotec              |        | 1:100 |        |
| Vimentin    | V5255                 | Sigma                    | 1:1000 |       |        |
| Vinculin    | V9264                 | Sigma                    | 1:1000 | 1:400 |        |
| α-Tubulin   | T5168                 | Sigma                    | 1:2000 |       |        |

**Supplementary Table 3. Antigen, provider, and dilution used in different experimental settings for all the commercial and non-commercial primary antibodies employed in this study.** Western blot (WB), immunofluorescence (IF), and immunoprecipitation (IP).
